# Supplementary material for: Interferon-γ-Inducible Protein 10 (IP-10) Kinetics after Antiretroviral Treatment Initiation in Ethiopian Adults with HIV
Source: PubMed Central journal article supplement (PMC8672912; doi:10.1128/spectrum.01810-21), 2021-12-15
Supplement: spectrum01810-21_supp_1_seq2.pdf [file spectrum01810-21_supp_1_seq2.pdf]

**Supplementary Table 1.** Timing of anti-TB treatment and antiretroviral treatment initiation in 18 TB+ study participants (17 virological responders, VRs).

| Treatment initiation | N             | Days between ATT and ART initiation (median [IQR]) |
|----------------------|---------------|----------------------------------------------------|
| ATT before ART       | 10/18 (55.5%) | 49 (27-63)                                         |
| ART before ATT       | 8/18 (44.4%)  | 18 (10-37)                                         |

Abbreviations: ATT, anti-TB treatment; ART, antiretroviral treatment; IQR, interquartile range.

**Supplementary Table 2.** Linear regression of baseline variables associated with IP-10 decline between clinical visits in virological responders (VR). All analyses are adjusted for IP-10 levels at the start of each time interval. No variable met the criteria to be retained in a final multivariate model, thus no such model is presented.

|                            | Baseline-Mo1      | Mo1-Mo3           | Mo3-Mo6         | Mo6-Mo12        |
|----------------------------|-------------------|-------------------|-----------------|-----------------|
|                            | Univariate        | Univariate        | Univariate      | Univariate      |
| Age                        | -3.9<br>(7.6)     | -5.1*<br>(3.5)    | -0.2<br>(1.1)   | -0.04<br>(0.3)  |
| Gender (female)            | -151.5<br>(150.4) | 60.6<br>(72.4)    | 31.5*<br>(21.5) | -13.5*<br>(7.1) |
| Baseline TB                | 179.3<br>(202.3)  | -153.3*<br>(90.2) | -7.7<br>(26.9)  | -10.8*<br>(7.5) |
| Log<br>Baseline VL         | -109.8<br>(100.2) | -52.2<br>(42.5)   | -1.6<br>(12.9)  | -5.1<br>(4.9)   |
| Baseline CD4<br>cell count | 0.3<br>(0.7)      | 0.273<br>(0.306)  | 0.0<br>(0.1)    | 0.08*<br>(0.04) |
| Baseline MUAC              | 28.7<br>(24.1)    | -5.1<br>(11.2)    | 1.7<br>(3.5)    | 0.4<br>(1.3)    |
| N                          | 91                | 78                | 60              | 28              |

Data presented as unstandardized Beta (Standard Error).

Abbreviations: TB, tuberculosis; VL, HIV viral load; MUAC, mid-upper arm circumference.

\*  $p < 0.2$

**Supplementary Table 3.** Performance of IP-10 in identifying individuals with viral load  $\geq 1000$  copies/ml 1, 3, 6, and 12 months after starting ART.

| Time-point | N   | VL $\geq 1000$ copies/ml, n (%) | AUROC (95% CI)      | IP-10 threshold (pg/ml) | Se. (95% CI; %)     | Sp. (95% CI; %)     | PPV (95% CI; %)     | NPV (95% CI; %)     |
|------------|-----|---------------------------------|---------------------|-------------------------|---------------------|---------------------|---------------------|---------------------|
| M1         | 112 | 17 (15.2)                       | 0.75<br>(0.65-0.86) | 276.5                   | 94.1<br>(71.3-99.9) | 45.3<br>(35.0-55.8) | 23.5<br>(19.8-27.7) | 97.7<br>(86.4-99.7) |
| M3         | 95  | 6 (6.3)                         | 0.68<br>(0.55-0.80) | 260                     | 83.3<br>(35.9-99.6) | 67.4<br>(56.7-77.0) | 14.7<br>(9.8-21.6)  | 98.4<br>(90.1-99.7) |
| M6         | 77  | 5 (6.5)                         | 0.56<br>(0.29-0.83) | 140.5                   | 80.0<br>(28.4-99.5) | 31.9<br>(21.4-44.0) | 7.6<br>(4.9-11.5)   | 95.8<br>(79.4-99.3) |
| M12        | 68  | 15 (22.1)                       | 0.79<br>(0.65-0.94) | 186                     | 86.7<br>(59.5-98.3) | 58.5<br>(44.1-71.9) | 37.1<br>(28.9-46.3) | 93.9<br>(80.7-98.3) |

Abbreviations: VL, viral load; AUROC, area under ROC curve; IP-10, interferon-gamma inducible protein 10; Se., sensitivity; Sp., specificity; PPV, positive predictive value; NPV, negative predictive value; M, month after ART initiation.

**Supplementary Table 4.** Viral load during the initial 12 months of ART in virological responders (VRs) and virological non-responders (VNRs).

|      | Baseline<br>VL (log <sub>10</sub><br>copies/ml) | Month 1 VL (copies/ml) |             |             | Month 3 VL (copies/ml) |             |            | Month 6 VL (copies/ml) |             |            | Month 12 VL<br>(copies/ml) |             |             |
|------|-------------------------------------------------|------------------------|-------------|-------------|------------------------|-------------|------------|------------------------|-------------|------------|----------------------------|-------------|-------------|
|      |                                                 | <150                   | 150-<br>999 | ≥1000       | <150                   | 150-<br>999 | ≥1000      | <150                   | 150-<br>999 | ≥1000      | <150                       | 150-<br>999 | ≥1000       |
| VRs  | 5.2<br>(4.6-5.6)                                | 42<br>(46%)            | 37<br>(41%) | 12<br>(13%) | 72<br>(88%)            | 10<br>(12%) | 0<br>(0%)  | 87<br>(97%)            | 3<br>(3%)   | 0<br>(0%)  | 80<br>(96%)                | 3<br>(4%)   | 0<br>(0%)   |
| VNRs | 5.4<br>(4.9-5.9)                                | 5<br>(24%)             | 11<br>(52%) | 5<br>(24%)  | 8<br>(44%)             | 4<br>(22%)  | 6<br>(33%) | 10<br>(50%)            | 4<br>(20%)  | 6<br>(30%) | 2<br>(10%)                 | 0<br>(0%)   | 18<br>(90%) |

Data presented as median (IQR) or n (%).

Abbreviations: VL, HIV viral load; VRs, virological responders; VNRs, virological non-responders.

**Supplementary Table 5.** IP-10 kinetics in virological responders (VRs) during the initial 6-12 months of antiretroviral treatment.

| <b>VRs with available IP-10 data at baseline, M1, M3 and M6</b>  |                             |               |               |               |
|------------------------------------------------------------------|-----------------------------|---------------|---------------|---------------|
|                                                                  | IP-10 levels (pg/ml)        |               |               |               |
|                                                                  | Baseline                    | M1            | M3            | M6            |
| VRs (n=60)                                                       | 642 (408-946)               | 304 (235-559) | 226 (137-358) | 156 (126-224) |
| VRs TB+ (n=12)                                                   | 1073 (642-1823)             | 441 (252-673) | 263 (202-606) | 174 (132-339) |
| VRs TB- (n=48)                                                   | 584 (362-851)               | 280 (181-518) | 210 (134-327) | 151 (125-224) |
|                                                                  | IP-10 decline (pg/ml/month) |               |               |               |
|                                                                  | Baseline-M1                 | M1-M3         | M3-M6         |               |
| VRs (n=60)                                                       | 301 (73-561)                | 42 (3-91)     | 21 ((-6)-38)  |               |
| VRs TB+ (n=12)                                                   | 622 (270-1049)              | 63 (1-109)    | 32 (17-89)    |               |
| VRs TB- (n=48)                                                   | 168 (61-414)                | 37 (3-84)     | 12 ((-7)-34)  |               |
| <b>VRs with available IP-10 data at baseline, M1, M3 and M12</b> |                             |               |               |               |
|                                                                  | IP-10 levels (pg/ml)        |               |               |               |
|                                                                  | Baseline                    | M1            | M3            | M12           |
| VRs (n=41)                                                       | 697 (446-1060)              | 343 (243-612) | 226 (144-382) | 159 (114-266) |
| VRs TB+ (n=9)                                                    | 1304 (662-2046)             | 636 (371-835) | 507 (200-772) | 193 (143-284) |
| VRs TB- (n=32)                                                   | 650 (408-874)               | 313 (238-519) | 203 (140-305) | 150 (107-267) |
|                                                                  | IP-10 decline (pg/ml/month) |               |               |               |
|                                                                  | Baseline-M1                 | M1-M3         | M3-M12        |               |
| VRs (n=41)                                                       | 374 (113-622)               | 48 (3-90)     | 7 ((-3)-22)   |               |
| VRs TB+ (n=9)                                                    | 624 (316-1212)              | 78 ((-8)-96)  | 35 (6-64)     |               |
| VRs TB- (n=32)                                                   | 319 (74-473)                | 32 (1-91)     | 5 ((-4)-12)   |               |

Data presented as median (IQR).

Abbreviations: VRs, virological responders; IP-10, interferon- $\gamma$ -inducible protein 10; M, month after ART initiation; TB, tuberculosis.
